# Supplementary material for: Dusky-like Is Critical for Morphogenesis of the Cellular Protuberances and Formation of the Cuticle in Henosepilachna vigintioctopunctata
Source: MDPI journal article supplement (doi:10.3390/biology12060866), 2023-06-15
Supplement: s1 [file s1]

Supplementary data

**Dusky-like Is Critical for Morphogenesis of the Cellular  
Protuberances and Formation of the Cuticle in  
*Henosepilachna vigintioctopunctata***

Yuxing Zhang, Qiao Tan, Mengjiao Lin, Chenhui Shen, Lin Jin

and Guoqing Li \*

Education Ministry Key Laboratory of Integrated Management of  
Crop Diseases and Pests, State & Local Joint Engineering  
Research Center of Green Pesticide Invention and Application,  
Department of Entomology, College of Plant Protection, Nanjing  
Agricultural University, Nanjing 210095, China;  
2020202042@stu.njau.edu.cn (Y.Z.);  
2020102083@stu.njau.edu.cn (Q.T.);  
2020102082@stu.njau.edu.cn (M.L.); 2019202031@njau.edu.cn  
(C.S.); jinlin@njau.edu.cn (L.J.)

\* Correspondence: ligq@njau.edu.cn; Tel./Fax: +86-25-84395248

**Table S1. A list of primers used for RT-PCR, dsRNA synthesis and qRT-PCR**

| Fragment name            | Forward primer (5'-3') | Reverse primer (5'-3')  |
|--------------------------|------------------------|-------------------------|
| <b>RT-PCR</b>            |                        |                         |
| <i>HvDusky-like</i>      | ATACTGGTACAGCAAACAAA   | CTCTGCATTGTCGTAACCT     |
| <b>dsRNA synthesis</b>   |                        |                         |
| <i>dsHvDusky-like</i> -F | TAATACGACTCACTATAGGGAT | TAATACGACTCACTATAGGGACT |
| 1R1                      | ACAAGTGGGCAAAGG        | ACGGAAGCAGATGG          |
| <i>dsHvDusky-like</i> -F | TAATACGACTCACTATAGGGGC | TAATACGACTCACTATAGGGCCA |
| 2R2                      | CCCTTGCTACACCAGATA     | CCATAACTAGCGGCATT       |
| <i>dsegfp</i>            | TAATACGACTCACTATAGGGAA | TAATACGACTCACTATAGGGCAC |
|                          | G TTCAGCGTGTCCG        | CTTGATGCCGTTC           |
| <b>qRT-PCR</b>           |                        |                         |
| <i>qHvDusky-like</i>     | TTCAGCAGCAGATCCAGAGA   | CCTCTAGCATGGACGAAAGC    |
| <i>qHvRPS18</i>          | CGCAATCAAAGGTGTTGGAAG  | GCCTAGGGTTGGCCATAATAG   |
| <i>qHvRPL13</i>          | AGCATCCTTCGCTCGTTTAG   | TTCGACAACCTGCCATTAGG    |

HvDyl

ATGACAAGGTCACCTTCATATGTTGAGCATCGCTATACTTGCAGTGTTATTTTAAAGGAACACACGC  
TGTGATGCACCAATACCAGACTCTGCGTCTCTTCCATTAGAACACAGAGGAATATACGGACCACCA  
CTTTCAGGTCCTGCTTATGCTCCTCCGTCCGCTCTCATACAGAGCGGAGGTGGTGGTGGAGGTTCA  
GATGATCCATGGCCCCCTTGCTACACCAGATATGCCCCAAATCAAACATTTGCAAGTACAGTGTGAA  
AAAACACATATGAGGGTGAATATTGAATTCGACCGCCCTTTCTATGGTATGATATTCTCCAAGGGT  
TTCTACAGTGATCACCCTGTGTACATTTGAAACCTGGTACTGGTCACTTGAGCGCCACATTTGAA  
ATATTCTTGAACAGTTGCGGCATGTCTTCATCGGCCAATCATAATGCCGCTAGTTATGGTGGACCA  
ACACCTAGTGGAAGCTATGTAGAGAACACAATTATAATTCAGTACGATCCATTTCGTACAAGAAGTT  
TGGGATCAAGCAAGAAAACCTACGTTGTACCTGGTATGATTTCTATGAGAAGGCTGTTACTTTCAGA  
CCATTCCAAGTAGATATGCTACATGCAGTTACTGCTAACTTCTTGGGCGATAATTTACAATGCTGG  
ATGCAAAATACAAGTGGGCAAAGGACCCTGGGCTTCTGAAGTATCTGGAATAGTGAATAATTGGACAA  
ACAATGACAATGGTACTCGCTATAAAAGATGATGAAAATAAGTTTCGATATGTTGGTCAGAACTGT  
GTGGCTCATGATGGAAGAGAGCACCAATTCAATTGGTTGATCAGTATGGTTGCGTTGTTAGACCT  
AAAATTATGAGTAAATTCCAGAAGATAAAGAACTTCGGACCATCTGCTTCCGTAGTGTTCATTTCGCT  
TATTTCCAAGCATTCAAATCCCAGATTCAATGAATGTTCAATTTCCAATGTGTAATTCAAGTCTGC  
AGATACAATTGTCCAGAACCTAAATGCGGGCATGGTCTTGGATTGTGAATGAGTATGGCGTTCCT  
GCATTAGGTGGCAGCGGACATGGAGGTAATTTGCATGCTGAATATGGACCTCCACCACTTCCAGAA  
TACAACGGAGTTTACCTGCATTCCCAGACCCAGACACCCTTCAGGCCCAACTGGAGCTTATTCT  
GAACCGAATCCTGATGTTGTTCTGCTCCACAAGCTCAAACATCTTCTCATCGACTTCGAATCCG  
TCAAATCTTTCTTCTTAGCACCGCAAAGTAACTCTCAGACAGGAAACGATTTGCATTTACCTCCA  
CCACCTCCACCTGGACACCACGGTCAATACAACACTGTGAAGAGGAAGAGCGATATCGAAGGAGAA  
TTCGAAAACAACCTAGCTACCTTAGGTGGACGTCCACGGACTTTGGAAAATCCTGCACAACCTCCAG  
GGTGTGAGACGTAGGCGCAGTCCTGACACATTCAACATTGTGGTTAGTCACGTCTATAAAAGAGAA  
GCTCAAGAAATGACTGACGTTAATACTAGTAGGATCATTCAAGTGGTTGCACCTGGAGATGTTAAC  
TTTGCTCTAAATTCTGCTCAAAACAACGAAACCGTAGTTATTCAATCAGCTTCAGCAGCAGATCCA  
GAGACAATTTGTATGTCCATCCCTAGTTTTGTGCTGGACTTGTGCTGCTCCTTTTAGTGCTTATC  
GTGTCGAGTTTAGTGGCTGCCCTTCTGTTTCGTGAGAGTACGCGCCATTGATAGGAAAGGAGCAGCA  
CCAGCTTTCGTCCATGCTAGAGGTTACGACAATGCAGAGTTCGTCAAAGTACCAAATTAG

**Figure S1. The positions of the primary and secondary dsRNA on the mRNA. The green represents the position of primary dsRNA (dsHvDusky-like-F1R1), The yellow represents the position of secondary dsRNA (dsHvDusky-like-F2R2).**

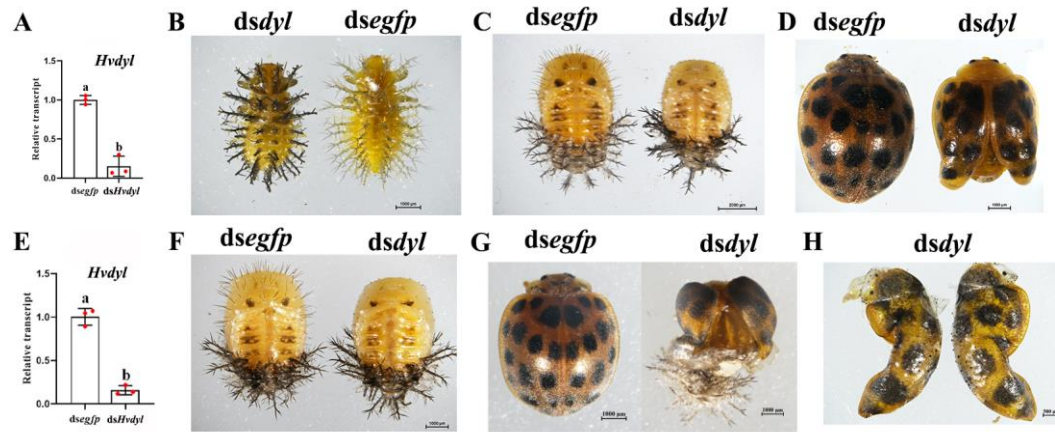

**Figure S2.** Knockdown of *Hvdyl* with secondary dsRNA at the third- and fourth-instar larval stage impairs growth of the cellular protuberances and the formation of cuticle in *Henosepilachna vigintioctopunctata*. The newly molted third- and fourth-instar larvae were injected with 300 ng *dsegfp* or *dsdyl* and then transferred to potato foliage. Two days after third-instar larvae injection, transcript levels of *Hvdyl* were measured (A). The phenotypes of fourth-instar larvae (B), pupae (C) and adults (D) were observed and imaged (third-instar larvae injection). Two days after fourth-instar larvae injection, transcript levels of *Hvdyl* were measured (E). Relative transcript levels are the ratios of relative copy number in treated individuals to that of *dsegfp*-injected controls, which was set as 1. The values represent means ( $\pm$  SE). Different letters indicate significant differences at  $P < 0.05$  using t test. The three biological replicates are marked with red dots. The phenotypes of pupae (F), adults (G) and elytra (H) were observed and imaged (fourth-instar larvae injection).
